# Supplementary material for: Bioinformatics-based screening of key genes for transformation of tyrosine kinase inhibitor-resistant lung adenocarcinoma to small cell lung cancer
Source: Front Med (Lausanne). 2023 Jul 31;10:1203461. doi: 10.3389/fmed.2023.1203461 (PMC10424445; doi:10.3389/fmed.2023.1203461)
Supplement: Supplementary file 6 [file Table_6.xlsx]

## Sheet: shRB VS shNC有无差异分析
Table S6 shRB VS shNC with or without difference analysis
Gene Name	LFQ intensity shRB_1	LFQ intensity shRB_2	LFQ intensity shRB_3	LFQ intensity shNC_1	LFQ intensity shNC_2	LFQ intensity shNC_3
WDR91	35899000	34183000	19957000
PEDS1		17750000	29056000
TCAF2	28335000	41748000	30256000
ATOX1	31375000		18617000
CHD2				61183000	49033000	60782000
IPO8	40684000	51555000	23225000
FIBP				26421000	21495000
KIF1B	48010000	53432000
CCDC22	37330000	40560000	34883000
ZNF737; ZNF93; ZNF25	22908000	26280000
CREG1	40529000		53073000
RTN3				526170000	483540000
STBD1		64321000	97487000
NAPSA				23111000	22850000	27805000
ICAM1	35865000		63588000
RB1				34901000	27659000
PROS1				29241000	24528000
SOD3				23251000	31907000	45389000
ESRRA				16769000		17895000
SRC				60886000		37163000
NF1		27150000	18141000
TSPO				1465900000	1212400000	506220000
PRKAR1B				21796000	26048000	15517000
TTK	19436000		15985000
CBS	34471000	29116000	32029000
SLC16A2				96728000	88413000	83224000
ARL2		21896000	46465000
IGHMBP2	9479600	14015000
LIMS1	45098000	49883000	37015000
MAPKAPK2	41328000	33185000
DNASE1L1	28906000	22167000	45567000
KNTC1				107060000		111420000
KPNA1				44644000	39380000	69225000
NDUFV3	47536000		65978000
RPP30				34484000	39232000	31240000
NTHL1	36097000		77593000
TLE3; TLE4				26610000		26186000
UBE2V1; UBE2V2	262430000	349330000	294800000
PTGR1		21200000	21446000
TTF1					27260000	11918000
NEDD8	92477000		74282000
IAH1	34362000		36563000
P3H1				27606000	32245000	33549000
ARHGAP11A; ARHGAP11B	48356000	61603000
CHD9	11847000	11787000
COA6					306030000	335030000
LRIF1				33223000	21175000
NT5DC1	34048000	40342000
VPS53				42244000	44145000
ARHGEF16	22779000		24943000
LPCAT4		17152000	26867000
MSL1				29326000		34234000
CWF19L1				46518000		30435000
NADSYN1	30966000		16527000
FBXO38		19245000	21490000
ADGRG6				25585000		20983000
ZBTB33					19097000	9808000
GTPBP8				16943000	13545000	18431000
OGFOD1	61003000	48178000	38185000
OTUD6B	64080000	84194000	43307000
CCNYL1					103880000	62070000
CXorf38		41533000	26920000
CUL5		21361000	16484000
MED12				36577000		58526000
SLC22A18					41395000	36072000
INTS12				45833000		42998000
TMEM141					280410000	188920000
ATXN2				26929000	18380000
MYD88					29016000	32178000
SH2D3A	27409000		19885000
PDCD2L	34774000	54674000	40999000
GINS3	11961000	33707000
KIFC1	25676000	32694000
NIBAN1	66033000	50205000	45592000
OSBPL5		27331000	37934000
PPIL3	30852000	25179000
RMI1	15849000	30213000	26563000
CERS4					152950000	174860000
KIF13B	109350000	112350000	238490000
CDC42SE1	65106000	47709000	53460000
ATG3		70687000	36158000
ARGLU1	131200000		148060000
ABI2	43422000	51038000
ITSN2					31913000	18030000
ABRACL		565550000	429800000
COPS7A	40703000	39781000
MALT1	3509500	8211700
TRPS1				14324000	14246000	31538000
MRM2				39241000	35357000
HOOK1				25121000	37325000
AGO1					13110000	29339000
TPCN1				32206000	39806000	65237000
HECTD1	29099000	23176000
CIZ1				28294000		32700000
DDX19B				78608000		26403000
MAGED2				49515000	47557000	60257000
PPIE				41338000		63931000
USP16					11489000	17625000
